# Supplementary material for: Information flow within the West African innovation systems
Source: Springer Nature journal article supplement (doi:10.1186/s40604-014-0005-y), 2014-10-24
Supplement: MOESM1 [file 11901824]

## **Multilingual abstracts**

Information flow within West African innovation systems

Eustache Mègnigbêto

### **Spanish**

Flujo de información en los sistemas de innovación de África Occidental

Resumen

Hemos usado la capacidad de información mutua y la transmisión de la misma como indicadores de circulación de conocimiento entre agentes de innovación. Las unidades de análisis han sido aquellas publicaciones científicas indexadas en Web of Science con al menos una dirección en África Occidental. Hemos hallado que, a nivel regional, la universidad es el mayor productor de conocimiento seguida, en este orden, por el gobierno y el sector industrial. Sin embargo, a nivel nacional, el gobierno es el mayor productor de conocimiento en la mayor parte de los países. La producción del sector industrial es débil tanto a nivel regional como a nivel de países individuales. En el caso de algunos países es completamente inexistente. La información mutua indica la existencia de sinergias entre los tres actores, tanto a nivel regional como nacional. No obstante, su valor es excesivamente bajo como para permitir una circulación fluida de conocimiento entre los actores.

### **French**

Les flux d'information dans les systèmes d'innovation en Afrique de l'Ouest

Résumé

Nous utilisons la puissance d'information mutuelle et de transmission comme indicateurs de la circulation de la connaissance entre les acteurs de l'innovation. Les unités d'analyse étant les publications scientifiques indexées dans le Web of Science avec une adresse au moins basée en Afrique de l'Ouest. Nous trouvons qu'au niveau régional l'université est le premier producteur de connaissance suivi des pouvoirs publics et de l'industrie ; cependant, au niveau

national, les pouvoirs publics sont le premier producteur d'information dans la majorité des pays. La production du secteur industriel est faible tant au niveau régional qu'au niveau individuel des pays. Il est même nul pour certains pays. L'information mutuelle indique une synergie entre les trois acteurs, tant au niveau régional que national. Cependant, sa valeur est trop faible pour permettre une circulation fluide de la connaissance entre les acteurs.

## **Russian**

Потоки информации в инновационных системах Западной Африки

Абстракт

Мы использовали индикаторы взаимной информации и энергии распространения в качестве индикаторов обмена знаний между инновационными акторами. Единицами анализа являются научные публикации, индексируемые в Web of Science, по крайней мере, с один адресом автора статей из Западной Африки. Мы нашли, что на региональном уровне, университет является крупнейшим производителем знаний, за ним следует правительство, а потом промышленность. Однако на национальном уровне, правительство является крупнейшим производителем знаний в большинстве стран. Промышленный сектор производит наименьшее количество знаний на региональном уровне и на уровне отдельных стран. В некоторых странах значение данного показателя равно нулю. Полученная информация указывает на существование синергии между тремя акторами как на региональном, так и национальном уровнях. Тем не менее, синергии слишком мало, чтобы обеспечить свободную циркуляцию знаний среди акторов.

## **Chinese**

在西非技术创新体系内的信息流

摘要:

我们把交互信息和传输功率用作在创新主体之间的知识循环的指标。在科学出版物中的分析单位用至少一个基于西非的地址在科学网上进行索引收录。我们发现，在区域的层次上，大学是最大的知识生产者，其次是政府，最后是产业；然而，在国家的层面上，在大多数国家里政府是最大的信息生产者。无论在区域还是在国家层面上，产业部门的输出都很弱。 在一些国家它甚至等于零。 交互信息表明，在区域和国家层面上都有（三螺旋）三个创新主体之间的协同作用的存在。然而，这种作用的价值太低，以至于不能让知识畅快地在主体之间循环。

## Arabic

تدفق المعلومات بنظم الابتكار في غرب إفريقيا

### ملخص

استخدمنا التبادل التثائي للمعلومات والقدرة على بثها كمؤشرات على تعميم المعرفة بين الفاعلين في مجال الابتكار. اعتمدنا على وحدات التحليل في المنشورات العلمية المفهرسة في "الويب للعلوم" مع استخدام عنوان واحد على الأقل منسوب إلى غرب أفريقيا. توصلنا إلى أنّ الجامعة هي أكبر منتج للمعرفة على الصعيد الإقليمي، متبوعة بالحكومة والمجال الصناعي في درجة ثانية، ولكن تعتبر الحكومة هي أكبر منتج للمعلومات على الصعيد الوطني في معظم البلدان. يعتبر إنتاج القطاع الصناعي ضعيفا سواء كان ذلك على الصعيد الإقليمي أو الداخلي للبلدان ويمكن أن يكون منعدما في بعضها. يظهر التبادل التثائي للمعلومات وجود حيوية بين الفاعلين الثلاثة سواء كان ذلك على الصعيد الإقليمي أو الوطني. ولكن مستوى هذه الحيوية هو أضعف من أن يسمح بتبادل سلس للمعارف بين الفاعلين.

## Portuguese

Fluxos de Informação nos Sistemas de Inovação no Oeste Africano

### Resumo

São utilizados como indicadores de circulação de conhecimento entre atores de inovação a informação mútua e o poder de transmissão. A unidade de análise são as publicações científicas indexadas na Web of Science com ao menos um endereço baseado no Oeste Africano. Nós encontramos que no nível regional, a universidade é o maior produtor de conhecimento, seguido, pelo governo e as empresas; entretanto, em nível nacional, o governo é o maior produtor de informações na maioria dos países. O resultado do setor empresarial é fraco tanto em nível regional, como em nível dos países. A informação mutual indica a existência de sinergia entre os três atores, tanto em nível nacional como regional. No entanto, o seu valor é muito baixo para permitir que o conhecimento circule fluentemente entre os atores.
